# Supplementary material for: Costs of Illness Due to Cholera, Costs of Immunization and Cost-Effectiveness of an Oral Cholera Mass Vaccination Campaign in Zanzibar
Source: PLOS journal article supplement (doi:10.1371/journal.pntd.0001844), 2012-10-04
Supplement: S4 (10.1371/journal.pntd.0001844.s004) [file journal.pntd.0001844.s004]

**Table S1.** Public variable costs of illness for cholera, Zanzibar, 2009.

|                                         | 2009 USD <sup>a</sup> |              | %          |
|-----------------------------------------|-----------------------|--------------|------------|
| <b>Drugs<sup>b</sup></b>                | <b>8.0</b>            | <b>(7.9)</b> | <b>88</b>  |
| Antibiotic: Ciproxine                   | 0.01                  | (0.08)       | 0.1        |
| Antibiotic: Doxycycline                 | 0.01                  | (0.13)       | 0.1        |
| Antibiotic: Erythromycine               | 0.52                  | (0.41)       | 5.6        |
| Antibiotic: Erythromycine syrup         | 0.10                  | (0.48)       | 1.1        |
| Antibiotic: Metronidazole               | 0.01                  | (0.04)       | 0.2        |
| Antibiotic: Septrine                    | 0.01                  | (0.04)       | 0.1        |
| IV fluid                                | 7.1                   | (7.7)        | 77         |
| Oral rehydration solution               | 0.25                  | (0.14)       | 2.8        |
| Other drugs: Mebendazole (anthelmintic) | 0.01                  | (0.01)       | 0.1        |
| Other drugs: Zinc sulphate              | 0.03                  | (0.07)       | 0.3        |
| <b>Material<sup>c</sup></b>             | <b>1.1</b>            | <b>(0.0)</b> | <b>12</b>  |
| Cannula (adults)                        | 0.34                  | (0.0)        | 3.8        |
| Examination gloves                      | 0.52                  | (0.0)        | 5.7        |
| IV giving set                           | 0.20                  | (0.0)        | 2.1        |
| Zinc oxide plaster                      | 0.05                  | (0.0)        | 0.6        |
| <b>Total costs</b>                      | <b>9.2</b>            | <b>(7.9)</b> | <b>100</b> |

<sup>a</sup>Mean costs and standard deviation in brackets;

<sup>b</sup>Drug resource use based on patient interviews (n = 95), drug unit costs include 6.0% for storage at medical store department and distribution;

<sup>c</sup>Standard resource use per patient based on expert interview: cannula (1-2 pieces), examination gloves (8 pairs), IV giving sets (1 piece) and Zinc oxide plaster (30 cm);  
IV: Intravenous.
